# Supplementary material
Source: publisher figshare collection journal article supplement (https://frontiersin.figshare.com/ndownloader/files/25744292)
Supplement: Supplementary file [file 25744292]

*Supplementary Material*

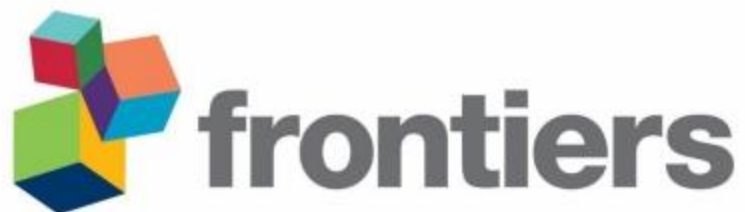

**Supplemental Table 1.** OncoScreen 68 genes  
list

---

|        |        |         |        |
|--------|--------|---------|--------|
| ALK    | BRAF   | EGFR    | ERBB2  |
| KRAS   | MET    | RET     | ROS1   |
| AKT1   | APC    | AR      | ARAF   |
| ATM    | AXL    | BCL2L11 | BRCA1  |
| BRCA2  | CCND1  | CD74    | CDK4   |
| CDK6   | CDKN2A | CTNNB1  | DDR2   |
| ERBB3  | ESR1   | ERBB4   | FGF19  |
| FGF3   | FGF4   | FGFR1   | FGFR2  |
| FGFR3  | FLT3   | HRAS    | IDH1   |
| IDH2   | IFG1R  | JAK1    | JAK2   |
| KDR    | KIT    | MAP2K1  | MTOR   |
| MYC    | NF1    | NOTCH1  | NRAS   |
| NRG1   | NTRK1  | NTRK2   | NTRK3  |
| PDGFRA | PIK3CA | PTCH1   | PTEN   |
| RAF1   | RB1    | SMAD4   | SMO    |
| STK11  | TOP2A  | TP53    | TSC1   |
| TSC2   | CYP2D6 | DPYD    | UGT1A1 |

---

**Supplemental Table 2.** Differences of genetic profiles among LUSC subtypes

|                     | KSCC  | NKSCC | BSCC  | P value |
|---------------------|-------|-------|-------|---------|
| FGFR1               | 0.0%  | 3.8%  | 7.7%  | 0.035   |
| ARAF                | 0.0%  | 2.6%  | 7.7%  | 0.038   |
| SMO                 | 0.0%  | 2.6%  | 7.7%  | 0.038   |
| FGFR1 Amplification | 11.4% | 26.9% | 7.7%  | 0.015   |
| IGF1R Amplification | 17.5% | 0.0%  | 15.4% | 0.011   |

**Abbreviations:** LUSC, lung squamous cell carcinoma; KSCC, keratinizing squamous cell carcinoma; NKSCC, nonkeratinizing squamous cell carcinoma; BSCC, basaloid squamous cell carcinoma

**Supplemental Table 3.** Differences of genetic profiles between KSCC and NKSCC

|                     | KSCC  | NKSCC | P value |
|---------------------|-------|-------|---------|
| FGFR1               | 0.0%  | 3.8%  | 0.066   |
| ARAF                | 0.0%  | 2.6%  | 0.164   |
| SMO                 | 0.0%  | 2.6%  | 0.164   |
| FGFR1 Amplification | 11.4% | 26.9% | 0.007   |
| IGF1R Amplification | 1.8%  | 0.0%  | 0.515   |

**Abbreviations:** KSCC, keratinizing squamous cell carcinoma; NKSCC, nonkeratinizing squamous cell carcinoma

**Supplemental Table 4.** Differences of genetic profiles between KSCC and BSCC

|                     | KSCC  | BSCC  | P value |
|---------------------|-------|-------|---------|
| FGFR1               | 0.0%  | 7.7%  | 0.102   |
| ARAF                | 0.0%  | 7.7%  | 0.102   |
| SMO                 | 0.0%  | 7.7%  | 0.102   |
| FGFR1 Amplification | 11.4% | 7.7%  | 1.000   |
| IGF1R Amplification | 1.8%  | 15.4% | 0.052   |

**Abbreviations:** KSCC, keratinizing squamous cell carcinoma; BSCC, basaloid squamous cell carcinoma

**Supplemental Table 5.** Differences of genetic profiles between NKSCC and BSCC

|                     | NKSCC | BSCC  | P value |
|---------------------|-------|-------|---------|
| FGFR1               | 3.8%  | 7.7%  | 0.466   |
| ARAF                | 2.6%  | 7.7%  | 0.374   |
| SMO                 | 2.6%  | 7.7%  | 0.374   |
| FGFR1 Amplification | 26.9% | 7.7%  | 0.176   |
| IGF1R Amplification | 0.0%  | 15.4% | 0.019   |

**Abbreviations:** NKSCC, nonkeratinizing squamous cell carcinoma; BSCC, basaloid squamous cell carcinoma

**Supplemental Table 6.** Differences of genetic profiles based on stage

| Stage  | FGFR1 wt | FGFR1 mut | P value |
|--------|----------|-----------|---------|
| I      | 100%     | 0%        | 0.038   |
| II     | 94.6%    | 5.4%      |         |
| III/IV | 100%     | 0%        |         |

**Abbreviations:** wt, wild type; mut,mutant type

**Supplemental Table 7.** Differences of genetic profiles based on gender

|       | Male  | Female | P value |
|-------|-------|--------|---------|
| TP53  | 93.6% | 68.8%  | 0.005   |
| SMAD4 | 0.5%  | 12.5%  | 0.017   |
| FLT3  | 3.7%  | 18.8%  | 0.034   |
| ARAF  | 0.5%  | 12.5%  | 0.017   |

**Supplemental Table 8.** Differences of genetic profiles based on smoking status

| Smoking status | TP53 wt | TP53 mut | P value |
|----------------|---------|----------|---------|
| Nonsmoker      | 22.5%   | 77.5%    | 0.001   |
| Smoker         | 4.9%    | 95.1%    |         |

**Abbreviations:** wt, wild type; mut, mutant type

**Supplemental Table 9.** Differences of genetic profiles based on age

| Age  | AXL wt | AXL mut | P value |
|------|--------|---------|---------|
| ≥60  | 99.4%  | 0.6%    | 0.046   |
| < 60 | 94.0%  | 6.0%    |         |

**Abbreviations:** wt, wild type; mut, mutant type

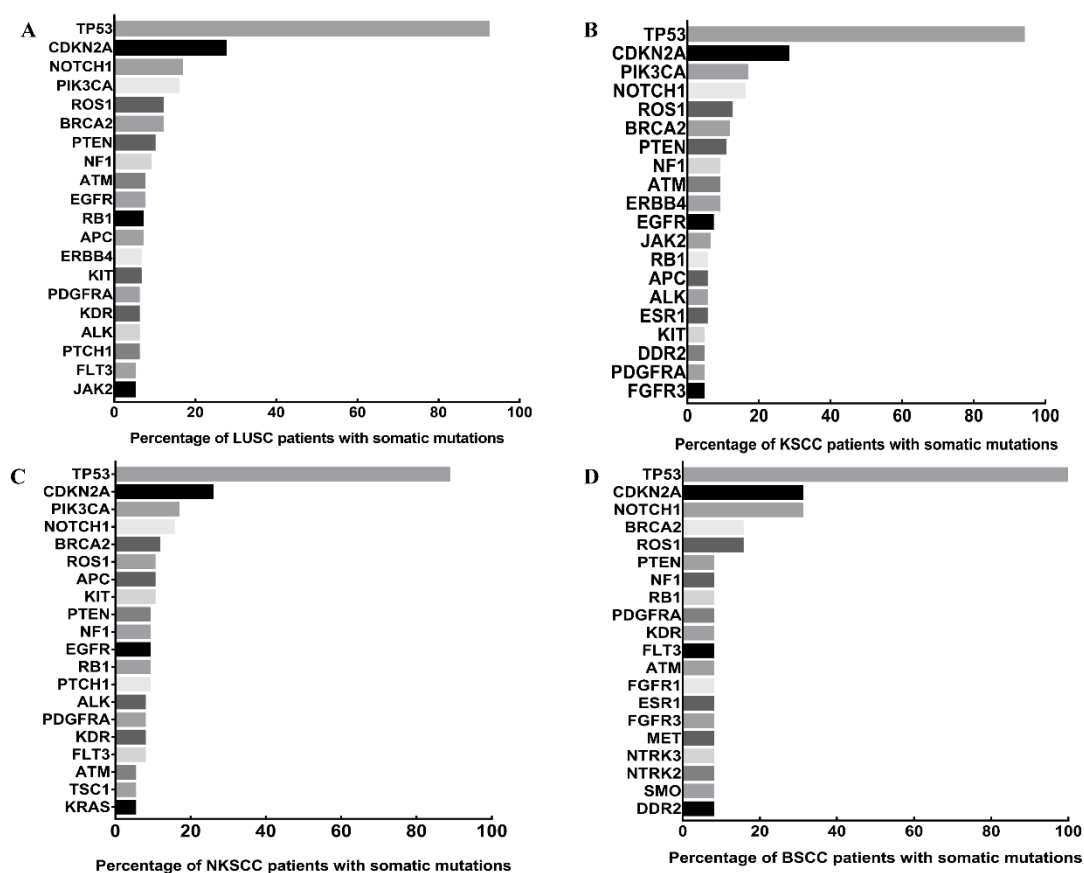

**Supplemental Figure 1.** Prevalence of TOP20 genes in Chinese patients with (A) LUSC, (B) KSCC, (C) NKSCC, (D) BSCC. X-axis denotes patient frequency, Y-axis, TOP20 genes. LUSC, lung squamous cell carcinoma; KSCC, keratinizing squamous cell carcinoma; NKSCC, nonkeratinizing squamous cell carcinoma; BSCC, basaloid squamous cell carcinoma.

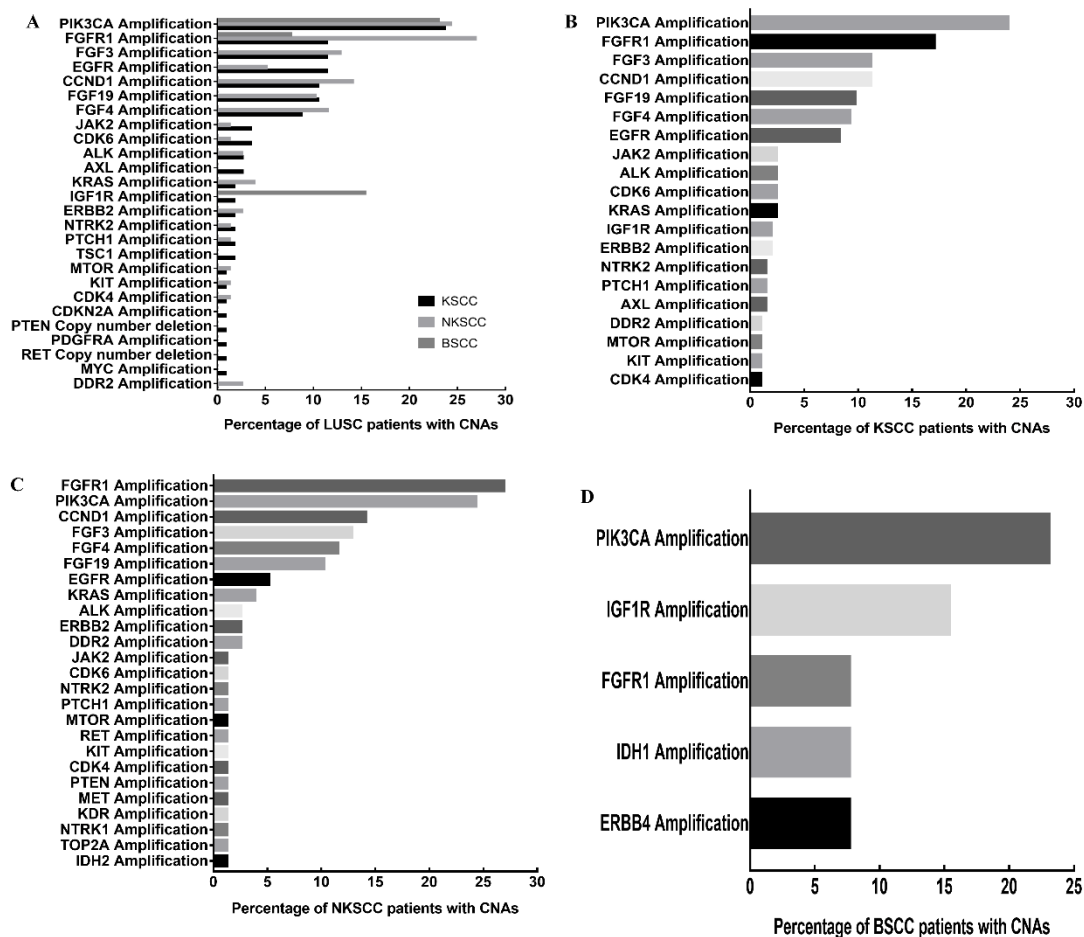

**Supplemental Figure 2.** Prevalence of the most commonly detected CNAs in Chinese patients with (A) LUSC, (B) KSCC, (C) NKSCC, (D) BSCC. X-axis denotes patient frequency, Y-axis, TOP20 genes. LUSC, lung squamous cell carcinoma; KSCC, keratinizing squamous cell carcinoma; NKSCC, nonkeratinizing squamous cell carcinoma; BSCC, basaloid squamous cell carcinoma.

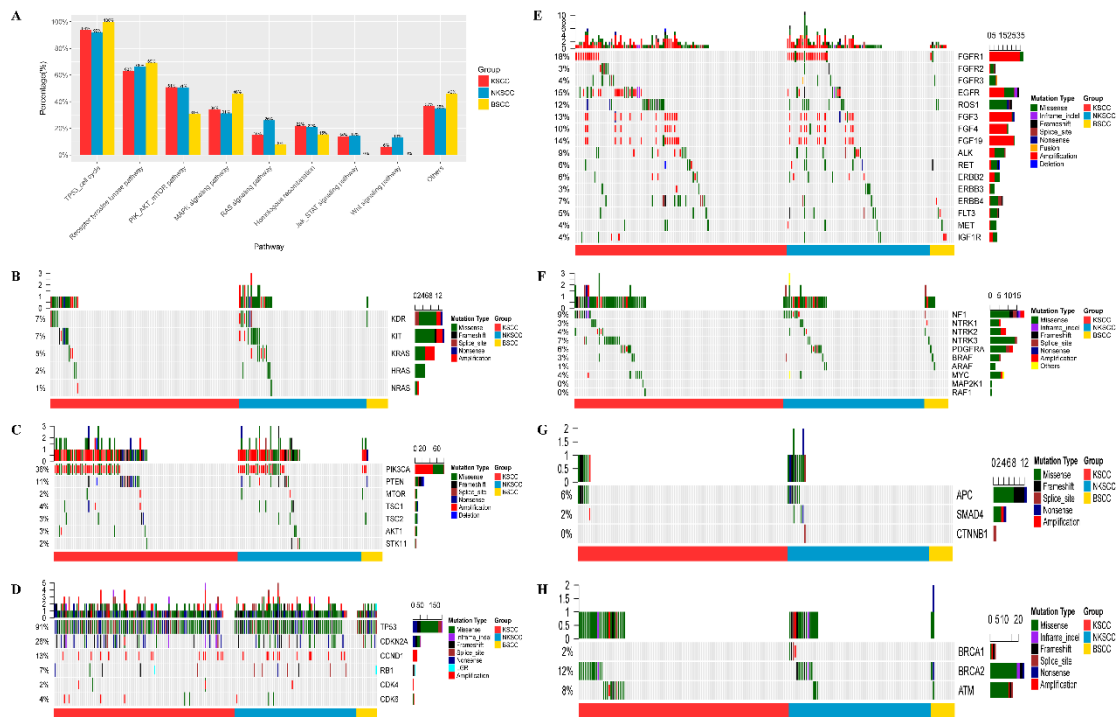

**Supplemental Figure 3.** (A) Prevalence of signaling pathway mutations including (B) RAS signaling pathway, (C) PIK-AKT-mTOR pathway, (D) TP53-cell cycle, (E) Receptor tyrosine kinase pathway, (F) MAPK signaling pathway, (G) Wnt signaling pathway and (H) Homologous recombination in different subtypes of LUSC. Each column represents a patient and each row represents a gene. Column on the left represents the mutation rate of each gene. Column on the right represents mutated genes. Top plot represents the overall number of mutations a patient carried. Different colors denote different types of mutation. KSCC, keratinizing squamous cell carcinoma; NKSCC, nonkeratinizing squamous cell carcinoma; BSCC, basaloid squamous cell carcinoma. KSCC, keratinizing squamous cell carcinoma; NKSCC, nonkeratinizing squamous cell carcinoma; BSCC, basaloid squamous cell carcinoma
